# Supplementary material for: Shifted Transversal Design smart-pooling for high coverage interactome mapping
Source: HighWire-hosted journal article supplement (doi:10.1101/gr.090019.108), 2009-05-15
Supplement: STD_GenomeResearch.zip [file Superposing_9.xls]

## Sheet: Sheet1
ID	WAMP	DITI		1536 in 384			384 in 384			384 in 96		96 in 96
			Add [SD-Trp + Glycerol]		Plate			Plate		sp_WASP-96
1	WAMP_01A	DITI	35 x 2	New-Plate!!! sp_WASP1x4.AB	1		New-Plate!!! sp_WASP6x4.A	1		New Plate!!! (#01)		New Plate!!! (#01)
2	WAMP_01B	DITI
3	WAMP_01C	DITI		sp_WASP1x4.CD			sp_WASP6x4.A
4	WAMP_01D	DITI
5	WAMP_01E	DITI	35 x 2	New-Plate!!! sp_WASP1x4.AB	2		sp_WASP6x4.A
6	WAMP_01F	DITI
7	WAMP_01G	DITI		sp_WASP1x4.CD			sp_WASP6x4.B			New Plate!!! (#02)
8	WAMP_01H	DITI
9	WAMP_01I	DITI	35 x 2	New-Plate!!! sp_WASP1x4.AB	3		sp_WASP6x4.B
10	WAMP_01J	DITI
11	WAMP_01K	DITI		sp_WASP1x4.CD			sp_WASP6x4.B
12	WAMP_01L	DITI
13	WAMP_02A	DITI	35 x 2	New-Plate!!! sp_WASP1x4.AB	4		sp_WASP6x4.C			New Plate!!! (#03)		New Plate!!! (#02)
14	WAMP_02B	DITI
15	WAMP_02C	DITI		sp_WASP1x4.CD			sp_WASP6x4.C
16	WAMP_02D	DITI
17	WAMP_02E	DITI		New-Plate!!! sp_WAMP2x4.A	5		sp_WASP6x4.C
18	WAMP_02F
19	WAMP_02G	DITI		sp_WAMP2x4.B			sp_WASP6x4.D			New Plate!!! (#04)
20	WAMP_02H
21	WAMP_02I	DITI		sp_WASP2x4.C			sp_WASP6x4.D
22	WAMP_02J
23	WAMP_02K	DITI		sp_WASP2x4.D			sp_WASP6x4.D
24	WAMP_02L
ID	WAMP	DITI		1536 in 384			384 in 384			384 in 96		96 in 96
					Plate			Plate		sp_WASP-96
25	WAMP_03A	DITI		New-Plate!!! sp_WASP2x4.A	6		New-Plate!!! sp_WASP6x4.A	2		New Plate!!! (#05)		New Plate!!! (#03)
26	WAMP_03B
27	WAMP_03C	DITI		sp_WASP2x4.B			sp_WASP6x4.A
28	WAMP_03D
29	WAMP_03E	DITI		sp_WASP2x4.C			sp_WASP6x4.A
30	WAMP_03F
31	WAMP_03G	DITI		sp_WASP2x4.D			sp_WASP6x4.B			New Plate!!! (#06)
32	WAMP_03H
33	WAMP_03I	DITI		New-Plate!!! sp_WASP2x4.A	7		sp_WASP6x4.B
34	WAMP_03J
35	WAMP_03K	DITI		sp_WASP2x4.B			sp_WASP6x4.B
36	WAMP_03L
37	WAMP_04A	DITI		sp_WASP2x4.C			sp_WASP6x4.C			New Plate!!! (#07)		New Plate!!! (#04)
38	WAMP_04B
39	WAMP_04C	DITI		sp_WASP2x4.D			sp_WASP6x4.C
40	WAMP_04D
41	WAMP_04E	DITI		New-Plate!!! sp_WASP2x4.A	8		sp_WASP6x4.C
42	WAMP_04F
43	WAMP_04G	DITI		sp_WASP2x4.B			sp_WASP6x4.D			New Plate!!! (#08)
44	WAMP_04H
45	WAMP_04I	DITI		sp_WASP2x4.C			sp_WASP6x4.D
46	WAMP_04J
47	WAMP_04K	DITI		sp_WASP2x4.D			sp_WASP6x4.D
48	WAMP_04L
ID	WAMP	DITI		1536 in 384			384 in 384			384 in 96		96 in 96
					Plate			Plate		sp_WASP-96
49	WAMP_05A	DITI		New-Plate!!! sp_WASP2x4.A	9		New-Plate!!! sp_WASP6x4.A	3		New Plate!!! (#09)		New Plate!!! (#05)
50	WAMP_05B
51	WAMP_05C	DITI		sp_WASP2x4.B			sp_WASP6x4.A
52	WAMP_05D
53	WAMP_05E	DITI		sp_WASP2x4.C			sp_WASP6x4.A
54	WAMP_05F
55	WAMP_05G	DITI		sp_WASP2x4.D			sp_WASP6x4.B			New Plate!!! (#10)
56	WAMP_05H
57	WAMP_05I	DITI		New-Plate!!! sp_WASP2x4.A	10		sp_WASP6x4.B
58	WAMP_05J
59	WAMP_05K	DITI		sp_WASP2x4.B			sp_WASP6x4.B
60	WAMP_05L
61	WAMP_06A	DITI		sp_WASP2x4.C			sp_WASP6x4.C			New Plate!!! (#11)		New Plate!!! (#06)
62	WAMP_06B
63	WAMP_06C	DITI		sp_WASP2x4.D			sp_WASP6x4.C
64	WAMP_06D
65	WAMP_06E	DITI		New-Plate!!! sp_WASP2x4.A	11		sp_WASP6x4.C
66	WAMP_06F
67	WAMP_06G	DITI		sp_WASP2x4.B			sp_WASP6x4.D			New Plate!!! (#12)
68	WAMP_06H
69	WAMP_06I	DITI		sp_WASP2x4.C			sp_WASP6x4.D
70	WAMP_06J
71	WAMP_06K	DITI		sp_WASP2x4.D			sp_WASP6x4.D
72	WAMP_06L
ID	WAMP	DITI		1536 in 384			384 in 384			384 in 96		96 in 96
					Plate			Plate		sp_WASP-96
73	WAMP_07A	DITI		New-Plate!!! sp_WASP2x4.A	12		New-Plate!!! sp_WASP6x4.A	4		New Plate!!! (#13)		New Plate!!! (#07)
74	WAMP_07B
75	WAMP_07C	DITI		sp_WASP2x4.B			sp_WASP6x4.A
76	WAMP_07D
77	WAMP_07E	DITI		sp_WASP2x4.C			sp_WASP6x4.A
78	WAMP_07F
79	WAMP_07G	DITI		sp_WASP2x4.D			sp_WASP6x4.B			New Plate!!! (#14)
80	WAMP_07H
81	WAMP_07I	DITI		New-Plate!!! sp_WASP2x4.A	13		sp_WASP6x4.B
82	WAMP_07J
83	WAMP_07K	DITI		sp_WASP2x4.B			sp_WASP6x4.B
84	WAMP_07L
85	WAMP_08A	DITI		sp_WASP2x4.C			sp_WASP6x4.C			New Plate!!! (#15)		New Plate!!! (#08)
86	WAMP_08B
87	WAMP_08C	DITI		sp_WASP2x4.D			sp_WASP6x4.C
88	WAMP_08D
89	WAMP_08E	DITI		New-Plate!!! sp_WASP2x4.A	14		sp_WASP6x4.C
90	WAMP_08F
91	WAMP_08G	DITI		sp_WASP2x4.B			sp_WASP6x4.D			New Plate!!! (#16)
92	WAMP_08H
93	WAMP_08I	DITI		sp_WASP2x4.C			sp_WASP6x4.D
94	WAMP_08J
95	WAMP_08K	DITI		sp_WASP2x4.D			sp_WASP6x4.D
96	WAMP_08L
ID	WAMP	DITI		1536 in 384			384 in 384			384 in 96		96 in 96
					Plate			Plate		sp_WASP-96
97	WAMP_09A	DITI		New-Plate!!! sp_WASP2x4.A	15		New-Plate!!! sp_WASP6x4.A	5		New Plate!!! (#17)		New Plate!!! (#09)
98	WAMP_09B
99	WAMP_09C	DITI		sp_WASP2x4.B			sp_WASP6x4.A
100	WAMP_09D
101	WAMP_09E	DITI		sp_WASP2x4.C			sp_WASP6x4.A
102	WAMP_09F
103	WAMP_09G	DITI		sp_WASP2x4.D			sp_WASP6x4.B			New Plate!!! (#18)
104	WAMP_09H
105	WAMP_09I	DITI		New-Plate!!! sp_WASP2x4.A	16		sp_WASP6x4.B
106	WAMP_09J
107	WAMP_09K	DITI		sp_WASP2x4.B			sp_WASP6x4.B
108	WAMP_09L
109	WAMP_10A	DITI		sp_WASP2x4.C			sp_WASP6x4.C			New Plate!!! (#19)		New Plate!!! (#10)
110	WAMP_10B
111	WAMP_10C	DITI		sp_WASP2x4.D			sp_WASP6x4.C
112	WAMP_10D
113	WAMP_10E	DITI		New-Plate!!! sp_WASP2x4.A	17		sp_WASP6x4.C
114	WAMP_10F
115	WAMP_10G	DITI		sp_WASP2x4.B			sp_WASP6x4.D			New Plate!!! (#20)
116	WAMP_10H
117	WAMP_10I	DITI		sp_WASP2x4.C			sp_WASP6x4.D
118	WAMP_10J
119	WAMP_10K	DITI		sp_WASP2x4.D			sp_WASP6x4.D
120	WAMP_10L
ID	WAMP	DITI		1536 in 384			384 in 384			384 in 96		96 in 96
					Plate			Plate		sp_WASP-96
121	WAMP_11A	DITI		New-Plate!!! sp_WASP2x4.A	18		New-Plate!!! sp_WASP6x4.A	6		New Plate!!! (#21)		New Plate!!! (#11)
122	WAMP_11B
123	WAMP_11C	DITI		sp_WASP2x4.B			sp_WASP6x4.A
124	WAMP_11D
125	WAMP_11E	DITI		sp_WASP2x4.C			sp_WASP6x4.A
126	WAMP_11F
127	WAMP_11G	DITI		sp_WASP2x4.D			sp_WASP6x4.C			New Plate!!! (#22)
128	WAMP_11H
129	WAMP_11I	DITI	35 x 2	New-Plate!!! sp_WASP1x4.AB	19		sp_WASP6x4.C
130	WAMP_11J	DITI
131	WAMP_11K	DITI		sp_WASP1x4.CD			sp_WASP6x4.C
132	WAMP_11L	DITI
133	WAMP_12A	DITI		New-Plate!!! sp_WASP2x4.A	20	36 x 2	sp_WASP6x4.B		90 / 60	New Plate!!! (#23)	135 x 2	New Plate!!! (#12)
134	WAMP_12B
135	WAMP_12C	DITI	35 x 2	sp_WASP1x4.AB-B			sp_WASP6x4.B_single			WASP-96_single		WASP-96_single
136	WAMP_13A	DITI		sp_WASP2x4.C		36 x 2	sp_WASP6x4.D		90 / 60	New Plate!!! (#24)	135 x 2	New Plate!!! (#13)
137	WAMP_13B
138	WAMP_13C	DITI	35 x 2	sp_WASP1x4.CD-D			sp_WASP6x4.D_single			WASP-96_single		WASP-96_single
